# Supplementary material
Source: publisher site journal article supplement (https://study.sagepub.com/sites/default/files/21%20Bloomberg%203e%20Appendix%20EE.pdf)
Supplement: Supplementary file 1 [file 21%20Bloomberg%203e%20Appendix%20EE.pdf]

## Appendix EE. Sample Consistency Chart of Findings, Interpretations, and Conclusions

| Findings                                                                                                                                                                                                      | Interpretations                                                                                                                                                                                                                                                                                                                                                                                                                                                                                      | Conclusions                                                                                                                                                                                                                                                                                                                                                                                  |
|---------------------------------------------------------------------------------------------------------------------------------------------------------------------------------------------------------------|------------------------------------------------------------------------------------------------------------------------------------------------------------------------------------------------------------------------------------------------------------------------------------------------------------------------------------------------------------------------------------------------------------------------------------------------------------------------------------------------------|----------------------------------------------------------------------------------------------------------------------------------------------------------------------------------------------------------------------------------------------------------------------------------------------------------------------------------------------------------------------------------------------|
| 1. The overwhelming majority of participants indicated that the course work did not prepare them to conduct research and write their dissertations.                                                           | <ul style="list-style-type: none"> <li>• Course work cannot fully prepare students for the practicalities involved in conducting research and writing a dissertation.</li> <li>• Doctoral programs do not provide a supportive environment.</li> <li>• There are unrealistic expectations on the part of programs vis-à-vis what students should be able to do.</li> <li>• There are unrealistic expectations on the part of students.</li> <li>• Personal idiosyncrasies come into play.</li> </ul> | Students who enroll in doctoral programs should not expect that course work alone will or can fully prepare them to conduct research and write their dissertations. Completion of a dissertation is a journey the student undertakes that is content specific and, as such, becomes a process of discovery. The primary purpose of course work is to provide a sound theoretical foundation. |
| 2. All 20 participants expressed the need to know the content and to understand the process involved in conducting research and writing their dissertations.                                                  | <ul style="list-style-type: none"> <li>• Content and process are intertwined.</li> <li>• During course work, students are not yet ready for the content knowledge.</li> <li>• Later, when students embark on dissertation work, they don't understand the rigorous process.</li> <li>• Students are unmotivated to carry out the process.</li> </ul>                                                                                                                                                 | Being grounded in theory alone is insufficient. Students also need practical know-how, and they need to acquire this through more informal means. In the absence of formal preparation, students need to be open to learning informally.                                                                                                                                                     |
| 3. The majority of participants attempted to learn what they needed to know by reaching out in dialogue with colleagues and others, rather than through more formal means.                                    | <ul style="list-style-type: none"> <li>• Adults learn best through dialogue, reflection, and collaboration, and so students struggling through the dissertation process seek out their colleagues.</li> <li>• Learning with colleagues who are in the same boat is comforting and might be less threatening than approaching "experts" to ask for advice.</li> </ul>                                                                                                                                 | Dialogue with colleagues in a similar situation can provide a source of support. Dialogue also offers the opportunity for reflection and action. Collaborative opportunities hold the potential for development of new understanding and new learning.                                                                                                                                       |
| 4. The majority of participants indicated that they relied on themselves to facilitate their progress. More than half of these same participants also said that colleagues were instrumental in helping them. | <ul style="list-style-type: none"> <li>• Adults generally want to feel in charge.</li> <li>• Adults generally want to be self-reliant.</li> <li>• When students find themselves in a "common" situation, they tend to band together in camaraderie and are empathic toward one another.</li> <li>• Determination is important!</li> </ul>                                                                                                                                                            | Most adult students have a preference for directing their own learning. Progress also is largely a function of personal characteristics as well as motivation and drive.                                                                                                                                                                                                                     |
| 5. The majority of participants cited lack of good, timely, and consistent advisement as a major barrier standing in the way of their progress.                                                               | <ul style="list-style-type: none"> <li>• The advisement that is available does not always meet students' needs.</li> <li>• Students might have unrealistic expectations of their advisors.</li> <li>• Advisement might be intentionally or unintentionally ineffective, and may in fact be a real impediment to students' progress.</li> </ul>                                                                                                                                                       | To move forward, students need support, feedback, and guidance from advisors. Timely and consistent advisement must be an integral part of the doctoral experience. The experience cannot function optimally as a solitary endeavor.                                                                                                                                                         |
